## Neuronal firing and waveform alterations through ictal recruitment in humans

Edward M. Merricks<sup>1</sup>, Elliot H. Smith<sup>1,2</sup>, Ronald G. Emerson<sup>3</sup>, Lisa M. Bateman<sup>1</sup>, Guy M. McKhann II<sup>4</sup>, Robert R. Goodman<sup>5</sup>, Sameer A. Sheth<sup>6</sup>, Bradley Greger<sup>7</sup>, Paul A. House<sup>8</sup>, Andrew J. Trevelyan<sup>9</sup>, Catherine A. Schevon<sup>1\*</sup>

1. Department of Neurology, Columbia University Medical Center, New York NY
2. Department of Neurosurgery, University of Utah, Salt Lake City UT
3. Department of Neurology, Weill Cornell Medical Center, New York, NY
4. Department of Neurosurgery, Columbia University Medical Center, New York NY
5. Department of Neurosurgery, Lenox Hill Hospital, New York NY
6. Department of Neurosurgery, Baylor College of Medicine, Houston TX
7. School of Biology and Health Systems Engineering, Arizona State University, Tempe AZ
8. Intermountain Healthcare, Murray UT
9. Institute of Neuroscience, Newcastle University, Newcastle upon Tyne, UK

\* Corresponding author: [cas2044@cumc.columbia.edu](mailto:cas2044@cumc.columbia.edu)

Number of figures: 9

Number of tables: 3

Words in abstract: 250

Words in introduction: 446

Words in discussion: 1,499

### Funding:

NIH R01 NS084142; CRCNS R01 NS095368

### Conflicts of interest:

None.

1 **ABSTRACT**

2 Clinical analyses of neuronal activity during seizures, invariably using extracellular recordings,  
3 is greatly hindered by various phenomena that are well established in animal studies: changes in  
4 local ionic concentration, changes in ionic conductance, and intense, hypersynchronous firing.  
5 The first two alter the action potential waveform, whereas the third increases the “noise”; all  
6 three factors confound attempts to detect and classify single neurons (units). To address these  
7 analytical difficulties, we developed a novel template-matching based spike sorting method,  
8 which enabled identification of 1,239 single units in 27 patients with intractable focal epilepsy,  
9 that were tracked throughout multiple seizures. These new analyses showed continued neuronal  
10 firing through the ictal transition, which was defined as a transient period of intense tonic firing  
11 consistent with previous descriptions of the ictal wavefront. After the ictal transition, neurons  
12 displayed increased spike duration ( $p < 0.001$ ) and reduced spike amplitude ( $p < 0.001$ ), in  
13 keeping with prior animal studies; units in non-recruited territories, by contrast, showed more  
14 stable waveforms. All units returned to their pre-ictal waveforms after seizure termination.  
15 Waveshape changes were stereotyped across seizures within patients. Our analyses of single  
16 neuron firing patterns, at the ictal wavefront, showed widespread intense activation, and  
17 commonly involving marked waveshape alteration. We conclude that the distinction between  
18 tissue that has been recruited to the seizure versus non-recruited territories is evident at the level  
19 of single neurons, and that increased waveform duration and decreased waveform amplitude are  
20 hallmarks of seizure invasion that could be used as defining characteristics of local recruitment.

21

22 **SIGNIFICANCE STATEMENT**

23 Animal studies consistently show marked changes in action potential waveform during epileptic  
24 discharges, but acquiring similar evidence in humans has proved difficult. Assessing neuronal  
25 involvement in ictal events is pivotal to understanding seizure dynamics and in defining clinical  
26 localization of epileptic pathology. Using a novel method to track neuronal firing, we analyzed  
27 microelectrode array recordings of spontaneously occurring human seizures, and here report two  
28 dichotomous activity patterns. In cortex that is recruited to the seizure, neuronal firing rates  
29 increase and waveforms become longer in duration and shorter in amplitude, while penumbral  
30 tissue shows stable action potentials, in keeping with the “dual territory” model of seizure  
31 dynamics.

## 32 **Introduction**

33           A complete understanding of the mechanisms underlying seizure pathology and dynamics  
34 depends on knowledge of the local neuronal activity, and what is driving that activity.  
35 Comparative animal models have long been used to gain insights into the underlying neuronal  
36 activity during seizures (Purpura *et al.*, 1972; Fariello *et al.*, 1976; Grone & Baraban, 2015), with  
37 the paroxysmal depolarizing shift (PDS) being regarded as the intracellular correlate of ictal  
38 discharges in animal models for more than half a century (Kandel & Spencer, 1961*a*, 1961*b*;  
39 Matsumoto & Marsan, 1964; Traub & Wong, 1982).

40           More recently, early PDSs have been shown to evolve into seizures *in vivo* (Steriade &  
41 Amzica, 1999), and PDSs have been recorded in resected human cortical tissue (Marcuccilli *et*  
42 *al.*, 2010; Eissa *et al.*, 2016). The PDS causes a decrease in action potential amplitude and an  
43 increase in half width – features that should impede standard spike sorting methods – and yet this  
44 phenomenon has not been reported in several studies of single unit activity during spontaneous  
45 human seizures (Wyler *et al.*, 1982; Babb *et al.*, 1987; Stead *et al.*, 2010; Truccolo *et al.*, 2011,  
46 2014; Bower *et al.*, 2012). In fact, beyond the PDS, altered action potential waveforms could be  
47 expected following recruitment of a recording site to a seizure due to alterations to Na<sup>+</sup> and K<sup>+</sup>  
48 concentrations in the intracellular and extracellular space or the effects of burst firing (Harris *et*  
49 *al.*, 2000).

50           We have shown preliminary evidence of such potential alterations (Merricks *et al.*, 2015).  
51 In tissue recruited to the seizure, traditional spike sorting methods can fail to cluster single units  
52 in human ictal recordings from neocortical layers 4/5, where neuronal cell body density is  
53 particularly high (Keller *et al.*, 2018), thereby hindering the ability to track evidence of wave  
54 shape alterations or neuronal firing patterns during and after the ictal wavefront (Merricks *et al.*,

55 2015). However, whether this originated from alterations to neurons' intrinsic wave shapes or  
56 simply from interference of action potentials from nearby, highly active cells has been unclear.

57 Here, we present analyses of neuronal activity in the human brain during focal seizures  
58 using novel template matching methods in order to characterize action potential waveform  
59 alterations and single unit firing patterns, as the ictal wavefront approaches, recruits, and passes  
60 the local tissue. We hypothesize that, similar to observations in animal models, human focal  
61 seizures consistently display alteration of intrinsic action potential shapes upon ictal recruitment.  
62 Specifically, we hypothesize that the distinction between recruited and penumbral tissue is  
63 maintained at the level of single neurons, with recruited cells displaying reduced spike amplitude,  
64 and increased duration, an effect that is absent in penumbral sites demonstrating increased firing  
65 rates, but lacking typical seizure hallmarks.

## 66 **Materials and Methods**

### 67 **Human recordings**

68 Adult patients undergoing surgical evaluation for pharmacoresistant focal epilepsy at  
69 Columbia University Irving Medical Center (CUIMC) and University of Utah were implanted  
70 with either a 96 channel, 4 x 4 mm "Utah"-style microelectrode array (UMA; Blackrock  
71 Microsystems, Salt Lake City, UT) or Behnke-Fried style microwires (BF array; Ad-tech  
72 Medical Equipment Corp, Oak Creek, WI) simultaneous to standard clinical electrocorticography  
73 (ECoG) or stereo-electroencephalography (sEEG) respectively. UMAs were implanted into  
74 neocortical gyri based on presurgical estimation of the ictogenic region, with electrode tips  
75 reaching layer 4/5 (1.0 mm electrode length; layer confirmed via histology in Schevon *et al.*  
76 (2012)), while BF arrays consisted of 8 microwires protruding ~4 mm from the tips of clinical  
77 depth electrodes.

78 Neural data were recorded at a sampling rate of 30 kHz on each microelectrode with a  
79 range of  $\pm 8$  mV at 16-bit precision, with a 0.3 Hz to 7.5 kHz bandpass filter. ECoG and sEEG  
80 data were collected with a sampling rate of either 500 Hz or 2 kHz, with 24-bit precision and a  
81 bandpass filter of 0.5 Hz to  $\frac{1}{4}$  the sampling rate. In UMAs, the reference was either subdural or  
82 epidural, chosen based on recording quality. In BF arrays, the reference was the ninth microwire  
83 within the bundle.

84 All procedures were approved by the Institutional Review Boards of CUIMC and  
85 University of Utah, and all patients provided informed consent prior to surgery. Clinical  
86 determination of seizure onset zone (SOZ) and seizure spread was made by the treating  
87 physicians and confirmed prior to analysis by two board-certified neurologists (CAS & LMB).  
88 All analyses were performed offline using custom scripts and toolboxes written in MATLAB  
89 (MathWorks, Natick MA). Code is available at <https://github.com/edmerix>.

90 The timing of the passage of the ictal wavefront at individual electrodes was calculated  
91 based on the MUA firing rate. A Gaussian kernel of 500 ms duration was convolved with the  
92 timings of all detected spikes in the MUA, and a sustained, significant increase in the resultant  
93 instantaneous firing rate was determined as the moment of local recruitment to the seizure (Smith  
94 *et al.*, 2016). A sustained ( $> 1$  s), significant increase had to be present for classification as ictal  
95 recruitment in order to discount single discharges or herald spikes. Ictal recordings without this  
96 signature of tonic to clonic MUA firing were determined to be penumbral. Note that unlike the  
97 SOZ, ictal recruitment and the penumbra are spatiotemporally dynamic. As such, a single  
98 location, unless at the true origin of the ictal activity, may receive the synaptic input of the  
99 upstream ictal activity but remain penumbral due to feed-forward inhibition initially, prior to the  
100 transition to the ictal state which may occur at any point during the electroclinical seizure event.

## 101 **Peri-ictal single unit discrimination**

102 Initial spike sorting was performed on the peri-ictal period as per Merricks *et al.* (2015).  
103 Briefly, neural signals were symmetrically bandpass filtered between 300 Hz and 5 kHz (1000<sup>th</sup>  
104 order FIR1) to extract multi-unit activity (MUA), from which extracellular action potential  
105 spikes were detected using a voltage threshold of  $4.5 \sigma$ , where  $\sigma = \text{median}\left(\frac{|x|}{0.6745}\right)$ , and  $x$  is the  
106 MUA from that channel. This method avoids the biasing effect of large spikes on channels with  
107 units with high firing rates (Quiñan Quiroga *et al.*, 2004). Ictal periods were blanked so that spike  
108 sorting was only performed on stable spikes from the peri-ictal period.

109 Matrices of waveforms from each channel were created from 0.6 ms prior to 1 ms post  
110 each detection, and principal component based semi-automatic cluster cutting was performed  
111 using a modified version of the “UltraMegaSort2000” MATLAB toolbox (Hill *et al.*, 2011).  
112 Artificially large waveforms were removed by calculating the FFT on spikes up-sampled by a  
113 factor of 4, and removing those with power  $> 5$  SD above the mean in frequencies above 2.5 kHz  
114 or below 500 Hz. Spikes removed in this manner were visually inspected to ensure correct  
115 classification as artefact. Clusters that satisfied the following criteria were accepted: (i) clean  
116 separation from all other clusters in the Fisher’s linear discriminant in principal component  
117 space; (ii) less than 1% contamination of the 2 ms absolute refractory period; (iii) no clear  
118 outliers based on the anticipated chi-squared distribution of Mahalanobis distances; and (iv) less  
119 than 1% of estimated false negatives as estimated by the amount of a Gaussian fit to the detected  
120 voltages fell below the threshold for detection, as described in Hill *et al.* (2011).

## 121 **Template matching through seizures**

122 Ictal recruitment has been shown to impede standard spike sorting due to either  
123 interference of hypersynchronous activity, intrinsic waveform alterations, or both (Merricks *et al.*,  
124 2015; Fig. 1). We therefore developed novel methods in order to match waveforms from the ictal

125 period, regardless of recruitment, to their putative neuronal source based on templates derived  
126 from the peri-ictal units. In contrast to standard spike sorting methods, these minimized false  
127 negatives at the expense of increasing false positives so as to avoid missing potential matches.  
128 Cluster boundaries were defined as the 3-dimensional convex hull surrounding the features in  
129 principal component space of the previously defined units from both the pre- and post-ictal  
130 period (Fig. 2). This method accounts for two situations: that neurons within recruited cortex  
131 maintain their wave shape but are obscured by interference from other nearby cells; or that there  
132 are occasional or consistent alterations to a neuron's intrinsic waveform that are minor enough to  
133 be maintained within the convex hull of feature space. The convex hull allows for alterations to  
134 wave shape in any dimension (any direction away from the cluster's centroid).

135 To avoid ictal results being biased through differing methods, template matching was  
136 performed on spikes that were extracted from a period from 10 minutes prior to 10 minutes post  
137 seizures, including the ictal activity that had been blanked in the original peri-ictal spike sorting.  
138 Channels with unstable units during interictal periods were excluded. Units with no spikes in  
139 either the preictal or ictal time period after template matching and artefact removal were  
140 excluded from further analyses ( $n = 77$ ).

141 Principal component scores were calculated on these spikes based on the previously  
142 defined principal components, and spikes that occurred within a peri-ictal unit's convex hull  
143 were assigned to that cell. Mahalanobis distances were calculated for all matches, between their  
144 location in principal component space and all peri-ictal waveforms from that unit, on the first  $n$   
145 principal components that explained  $> 95\%$  of the variance in the data set (Fig. 2C). The  
146 expected distribution of Mahalanobis distances was calculated as the chi-squared probability  
147 distribution with  $n$  degrees of freedom. Spikes that had  $< 0.1\%$  chance of occurring in the chi-  
148 squared distribution were excluded.



149 **Spike metrics**

150           The full-width at half maximum (FWHM) was calculated by up-sampling each spike by a  
151 factor of 4, normalizing the spike voltages to between [-1, 1], and finding the difference between  
152 the zero-crossings either side of the spike's trough. When calculating spike amplitude changes  
153 through the ictal transition, only units whose mean voltage at detection was at least 2.5 SD away  
154 from that channel's threshold for detection were used, to minimize the floor effect from small  
155 units that dropped below threshold.

156           The probability that each spike arose from its assigned peri-ictal unit was calculated by  
157 fitting a separate Gaussian curve (with a maximum amplitude of 1) to the distribution of voltages  
158 at each data point in the original unit, and calculating the mean probability across all time  
159 samples. As such, a waveform passing through the most likely voltage at each separate time  
160 point for that unit would have a match probability of 1 (Fig. 3). Instantaneous firing rates were  
161 calculated by convolving the spike times with a Gaussian kernel (200 ms SD) with the amplitude  
162 scaled to that spike's probability of matching the original unit, thereby creating probabilistic  
163 firing rates for each unit through time, by probability of when the spike occurred and probability  
164 that the spike originated from the putative neuronal source. As such, a waveform that had an  
165 average probability of 20% across all fitted Gaussians from each data point would contribute  
166 only 0.2 spikes  $s^{-1}$  at its most likely time point, while an exact match to the most likely voltage at  
167 each time point would contribute 1 spike  $s^{-1}$ . Thresholds for significant increases and decreases  
168 in firing rate were calculated as 3 times the square root of the firing rate divided by the duration  
169 of the epoch, which approximates 3 SD for a Poisson distribution.

170           Timing of FWHM alteration relative to the earliest ictal activity was determined by the  
171 earliest timepoint during the seizure that the mean FWHM remained above the preictal mean

172 plus the preictal standard deviation for at least 1 second, calculated in a sliding window of 5 s  
173 duration with a time step of 50 ms, discarding windows with fewer than 5 spikes.

174 All statistical tests for significance were performed using the Mann-Whitney U test  
175 unless otherwise noted, due to the non-Gaussian distributions of data requiring non-parametric  
176 testing. For all tests, the level for statistical significance ( $\alpha$ ) was set to 0.05, and Holm-  
177 Bonferroni correction was applied in all instances of multiple tests.

## 178 **Results**

179 We analysed ictal recordings from 27 patients undergoing invasive EEG monitoring as  
180 part of the presurgical evaluation for intractable focal epilepsy (Tables 1 & 2; age range = 19 to  
181 55; 13 female, 14 male). Six patients were implanted with Utah microelectrode arrays (UMA;  
182 Blackrock Microsystems Inc, Salt Lake City, UT), and the remaining 21 patients were implanted  
183 with between 1 and 4 Behnke-Fried depth arrays with incorporated microwire bundles (BF  
184 arrays; Ad-tech Medical Equipment Corp, Oak Creek, WI). A total of 41 seizures were reviewed  
185 (10 UMA; 31 BF array), of which 27 demonstrated ictal recruitment through MUA firing rate  
186 calculation in UMAs, or subsequent waveform alterations in BF arrays (see Methods; UMA: 6  
187 seizures from 3 patients; BF arrays: 21 seizures from 13 patients).

### 188 **Dual activity types at seizure onset**

189 To assess the presence of physiological spike shape changes across populations of  
190 neurons, template matching using convex hulls (Fig. 2, see Methods) was employed on each  
191 UMA-recorded seizure (Table 1; 1,107 single units in total; range of units per seizure: 61 – 240;  
192 mean  $\pm$  SD maximum units per patient: 122  $\pm$  63). The convex hull fits a 3-dimensional region  
193 around the peri-ictal unit's cluster in principal component space, within which waveforms are  
194 assigned as a putative match to that neuron. This allows for assigning unit identities without the  
195 need for maintained cluster boundaries in the data, while accepting waveform alterations that

196 alter the principal component scores. In total, 938 of the 1,107 units recorded on UMAs were  
197 successfully tracked through seizures using this method.

198 Individually, results from the template matching method in recordings from recruited  
199 tissue (see Methods; Patients 3, 4 & 5) showed decreases in spike amplitude and increases in  
200 spike full-width at half maximum (FWHM; Fig. 4, ictal waveforms in red), and were stereotyped  
201 across seizures within patient (Fig. 5). At the population level, units in recruited cortex displayed  
202 a significant global increase in FWHM (Fig. 6A; pre-ictal vs. ictal mean  $\pm$  SD:  $0.470 \pm 0.137$  ms  
203 vs.  $0.611 \pm 0.194$  ms), with 457 (81.5%) of 561 single units showing a significant ( $p < 0.05$ )  
204 increase in FWHM during the seizure (Holm-Bonferroni corrected Mann-Whitney U test; range  
205 across seizures: 79% – 97%; see Table 3). Meanwhile, units in penumbral cortex showed only a  
206 minor increase in FWHM at the population level (Fig. 6B; pre-ictal vs. ictal mean  $\pm$  SD:  $0.414 \pm$   
207  $0.009$  ms vs.  $0.429 \pm 0.099$  ms) with only 9 (5.8%) of 156 single units showing a significant ( $p <$   
208  $0.05$ ) increase in FWHM during the seizure (Holm-Bonferroni corrected Mann-Whitney U test;  
209 range across seizures: 4% – 16%; see Table 3). In a single case (Patient 6), the UMA was at the  
210 edge of the clinically defined ictal spread, and in this patient 105 (47.5%) of 221 units showed a  
211 significant increase in FWHM (pre-ictal vs. ictal mean  $\pm$  SD:  $0.408 \pm 0.111$  ms vs.  $0.421 \pm 0.152$   
212 ms). These spike shape alterations co-existed with stable spike shapes elsewhere on the UMA at  
213 the same time (Fig. 7), and this patient was incorporated into the penumbral dataset for  
214 population representation in the figures (Fig. 6). FWHM increases in recruited tissue were  
215 significantly larger than those in penumbral/edge case recordings ( $p < 0.001$ ; one-tailed Mann-  
216 Whitney U test).

217 Similarly, units in recruited cortex showed a significant decrease in spike amplitude  
218 during the seizure (Fig. 6C; pre-ictal vs. ictal mean  $\pm$  SD:  $48.82 \pm 30.91$   $\mu$ V vs.  $34.96 \pm 19.54$   
219  $\mu$ V), while penumbral recordings maintained their peri-ictal amplitude (Fig. 6D; pre-ictal vs.

220 ictal mean  $\pm$  SD:  $46.69 \pm 16.59$   $\mu$ V vs.  $45.08 \pm 15.05$   $\mu$ V in fully penumbral cases;  $47.00 \pm 21.18$   
221  $\mu$ V vs  $45.57 \pm 20.93$   $\mu$ V in the semi-recruited UMA). The amplitude reduction in recruited tissue  
222 was significantly greater than in penumbral/edge case recordings ( $p < 0.001$ ; one-tailed Mann-  
223 Whitney U test), with recruited recordings showing significant ( $p < 0.05$ ) decreases in amplitude  
224 during the seizure in 49.3% of units versus 6.4% of units in the penumbra and 38.9% in semi-  
225 recruited tissue (Holm-Bonferroni corrected Mann-Whitney U test).

### 226 **Spike shape changes in deep structures**

227 To assess the spatiotemporal relationship between waveform alterations and seizure  
228 recruitment within patients, beyond the capabilities of the 4 mm<sup>2</sup> Utah array, we analysed BF  
229 array recordings with the equivalent template matching, blind to the clinically-defined seizure  
230 onset zone and areas of propagation. In BF array recordings, 120 of 132 units were successfully  
231 tracked using these methods. Thirty of 120 single units (25.0%) showed increases beyond a cut-  
232 off significance level of  $p < 0.05$  (Holm-Bonferroni corrected Mann-Whitney U test) in FWHM  
233 (17 seizures from 13 patients), and 30 units (25.0%; 16 seizures from 11 patients) showed  
234 reduction in spike amplitude below the same significance cut-off ( $p < 0.05$ ; Table 2). In 9  
235 seizures from 6 patients, single units were simultaneously present on multiple separate BF arrays  
236 (on different bundles of microwires, as opposed to different microwires within a single BF), of  
237 which 7 seizures (6 patients) showed waveform alterations in at least one unit. Of these, 2  
238 seizures (2 patients) showed significant waveform alterations in dual locations (Patients 14 and  
239 15; Fig. 8; Table 2), while 5 seizures (4 patients) showed both activity types simultaneously  
240 (Patients 11, 12, 16 and 21; Video 1).

241 We found significant waveform alterations in 13 patients. Five of these had a clinically  
242 defined SOZ in the mesial temporal lobe, and simultaneously recorded single units in the  
243 ipsilateral hippocampus demonstrated significant waveform alterations (Patients 8, 15, 16, 26 &

244 27; Table 2). In 7 further patients, significant waveform alterations were found in tissue  
245 consistent with putative seizure spread due to proximity to the SOZ, or due to seizure  
246 generalization. In one case (Patient 10) we found waveform alterations in the contralateral  
247 hippocampal body, consistent with propagation of the seizure through the hippocampal  
248 commissural fibers. Conversely, in the 8 patients showing no significant waveform alterations,  
249 the clinically defined SOZ was anatomically distant in all cases (Patients 9, 13, 17–20, 24 & 25;  
250 Table 2).

251 To assess whether the classification of ictal recruitment via waveform alterations was  
252 consistent with the clinically defined SOZ and regions of spread, the time from earliest ictal  
253 activity to a consistent ( $\geq 1$  s duration) increase in FWHM  $\geq 1$  SD above the mean preictal level  
254 for each unit was calculated. FWHM was used independently of amplitude for these tests to  
255 control for any potential fluctuations in amplitude introduced by the reference electrode during  
256 seizures. Recordings determined to be in the SOZ showed a mean ( $\pm$  SD) delay of  $10.23 \pm 3.03$  s  
257 ( $n = 6$  seizures from 5 patients), while those deemed to be in regions of spread showed a mean ( $\pm$   
258 SD) delay of  $22.96 \pm 12.59$  s ( $n = 8$  seizures, 8 patients;  $p < 0.05$ , Mann-Whitney U test). In one  
259 case, single unit waveforms remained stable throughout a focal to bilateral tonic-clonic seizure  
260 (Patient 18; Table 2), further countering the possibility of transient movement artefact  
261 introducing instability in the waveforms.

262 In one instance of a patient recorded with BF arrays in the hippocampal head and body, a  
263 peculiarly discrete unit cluster due to a very large amplitude spike (mean =  $354 \mu\text{V}$ ; background  
264 noise level =  $25 \mu\text{V}$ ) enabled us to follow its action potential through the ictal transition without  
265 the need for template matching via convex hulls, despite marked changes to spike shape and  
266 increases in other unit activity (Fig. 8; Video 2; Schevon *et al.*, 2019). In this example, the  
267 seizure initiated very close to, but not at the electrode site. The ictal wavefront arrived at the

268 electrode approximately 8 s after seizure initiation (Patient 15; Table 2). The action potential  
269 amplitude was stable during both the pre-ictal period and the moments after seizure initiation,  
270 but reduced sharply upon the abrupt increase in firing rate indicating ictal recruitment (Fig. 8A &  
271 B, magenta dashed line; preictal vs. ictal mean  $\pm$  SD:  $354.2 \mu\text{V} \pm 45.7 \mu\text{V}$  vs.  $265.7 \mu\text{V} \pm 33.4$   
272  $\mu\text{V}$ ;  $p < 0.001$ , Mann-Whitney U test). The inter-spike interval to spike amplitude relationship  
273 was similar to animal models of recruitment (c.f. Supplementary Fig. 4 in Merricks *et al.*, 2015;  
274  $0 \text{ Mg}^{2+}$  *in vitro* cell-attached mouse slice model), and echoed the template matched results in the  
275 Utah array (note the similarity between Fig. 4B and Fig. 8D).

276 Notably, a separate single unit recorded at an adjacent BF array showed spike shape  
277 changes which developed 1 second later, consistent with seizure propagation (Fig. 8B ii; Table 2).  
278 The distinct time course of these two units recorded in the hippocampal head and body show that  
279 the alterations are unit-specific and not caused by local changes as a result of the seizure or by  
280 movement artefacts (the seizure had a relatively calm semiology, without stressing the recording  
281 device).

282 Simultaneously, action potential FWHM was stable prior to ictal recruitment, increasing  
283 significantly after the passage of the ictal wavefront (preictal vs. ictal mean  $\pm$  SD:  $0.33 \text{ ms} \pm 0.04$   
284  $\text{ms}$  vs.  $0.40 \text{ ms} \pm 0.05 \text{ ms}$ ;  $p < 0.001$ , Mann-Whitney U test). The time course of this transition  
285 followed the same progression as the spike amplitude (Fig. 8D), as can be seen in the pre-  
286 recruitment versus post-recruitment mean ( $\pm$  SD) waveforms (Fig. 8C, blue and red respectively).

### 287 **Template matching accuracy**

288 Spike matches from the convex hull method were found to be significantly more likely to  
289 arise from their assigned peri-ictal units than by chance, as calculated by comparing each  
290 matched waveform's similarity to its peri-ictal unit's distribution of voltages through time (Fig.  
291 3; "Spike metrics" in Methods). The "null" distribution for expected match probabilities by

292 chance was calculated through comparing each waveform's similarity to the peri-ictal voltage-  
293 time distributions of all other units. Comparing intra- to inter-unit similarities in this way found a  
294 significantly higher similarity between template matched units and their presumed peri-ictal unit  
295 than to the "null" distribution of matches to other units ( $p < 0.001$ ; Mann-Whitney U test; Fig.  
296 3B).

297 To confirm that these findings were not a result of the template matching method  
298 introducing an unknown variable that affects these measurements, results from the original spike  
299 sorted data and those originating from the convex hull method on the pre-ictal period were  
300 compared, finding little difference between the traditional cluster cutting results and the convex  
301 hull matched results (Fig. 6 A-D i, inset cumulative histograms).

### 302 **Neuronal firing rates through the ictal transition**

303 In animal models, it is possible to isolate single units experimentally, by visually guiding  
304 electrodes directly onto cells (Trevelyan *et al.*, 2006). This obviously is not possible in human  
305 recordings, and consequently, there is a dearth of evidence about the firing patterns of human  
306 neurons through seizures. Instead, previous studies have identified the ictal wavefront in terms of  
307 multi-unit activity (Schevon *et al.*, 2012; Smith *et al.*, 2016). We therefore analysed the firing  
308 rates of template matched unit populations throughout ictal activity and related these to the ictal  
309 wavefront (UMA recordings showing tonic to clonic firing; Patients 3–5; see Methods). Single  
310 unit firing rate increased during ictal recruitment in all seizures with 446 (79.5%) of 561 units  
311 showing greater than 3 SD increase in firing rate, and only 1 unit in the entire population  
312 showing a greater than 3 SD decrease in firing rate (range of single units with  $> 3$  SD increase  
313 per seizure: 70% – 96%; see Table 3). An example seizure demonstrating these trends is shown  
314 in Fig. 9.

## 315 **Discussion**

316       The analyses presented here explored the impact of spike shape alterations in  
317 spontaneously occurring seizures, in humans, how these alterations relate to the underlying ictal  
318 territories, and whether the ictal wavefront – the source of seizure propagation – involves local  
319 neuronal firing or is dominated by subthreshold or synaptic activity. We have previously shown  
320 that traditional spike sorting methods fail upon ictal invasion of the recording site (Merricks *et*  
321 *al.*, 2015), however, in these recordings it was not possible to differentiate between loss of spike  
322 sorting ability due to intrinsic waveform alterations, or due to hypersynchronous activity  
323 (Trevelyan *et al.*, 2006, 2007; Schevon *et al.*, 2012; Weiss *et al.*, 2013). Here, we sought to  
324 overcome this limitation through novel methods to track units through the ictal transition,  
325 retaining the identities of putative individual neurons. We hypothesized that the temporary loss  
326 of clusters was due in part to transient alterations to spike shapes, as opposed solely to  
327 obfuscation of stable spike shapes by the sudden increase in activity in the MUA, and that units  
328 at brain sites not demonstrating evidence of ictal recruitment via tonic firing in the MUA would  
329 remain stable.

330       We applied this method in two types of microelectrode recordings: UMA and BF arrays,  
331 representing neocortical and deep structure, particularly hippocampal, seizure foci. Although  
332 there must be some expected loss of detection sensitivity due to interference from highly  
333 synchronous firing along with the reduction of amplitude of some units below the noise threshold,  
334 the method proved remarkably effective, enabling us to define firing rate metrics for the majority  
335 of units throughout the seizure, highlighting a lack of neuronal quiescence during seizures.

336       In both types of recording, template matched units during the ictal period displayed two  
337 types of activity: deformation of waveshapes across the population, or largely stable waveforms.  
338 The UMA afforded the ability to detect local ictal recruitment through characteristic MUA firing,



339 and these types of activity corresponded to recruitment and penumbral recordings respectively  
340 (Fig. 6). Waveform alterations recovered after seizure termination and showed a stereotyped  
341 response across seizures, highlighting that a single neuron's wave shape change, in response to  
342 the synaptic barrage of upstream ictal activity, is maintained across multiple seizures hours apart.  
343 Note that the template matching method would equally favor alterations to waveform in any  
344 dimension, and so if these changes were purely a result of the methodology, we would  
345 reasonably expect the template to capture spikes with larger amplitude and decreased FWHM at  
346 an equal rate. In such a case, we would anticipate a broadening of the distribution of these  
347 features during the ictal period. Instead, we see a clear shift in the distributions to the right and  
348 left in the FWHM and amplitude respectively, and found no evidence of increased spike  
349 amplitude during seizures, arguing for a consistent physiological cause (Fig. 6A&C).

350         Detection of the ictal wavefront was not possible in BF arrays, due to a combination of  
351 lower neuronal density in mesial structures relative to layer 4/5 neocortex (Pakkenberg &  
352 Gundersen, 1997; Keller *et al.*, 2018), and a reduced “listening sphere” relative to UMAs due to  
353 higher impedance (BF: 50-500 k $\Omega$ ; UMA: 80-150 k $\Omega$ ; Tóth *et al.*, 2016). Nonetheless, the same  
354 waveform features were detected, and their presence correlated well with the clinical assessment  
355 of SOZ and seizure spread (Table 2). Furthermore, BF arrays allowed for sampling of multiple  
356 sites in a given patient, and the timing of waveform alterations correlated well with clinical  
357 observations, with seizure spread locations showing delayed waveform changes compared to  
358 recordings from SOZ regions (22.96 vs. 10.23 s respectively). The longest delay until  
359 recruitment occurred after spread to the contralateral hippocampus (Patient 10; 42.7 s). The only  
360 case with discordance between single unit and clinical data showed a statistically significant  
361 increase in FWHM during the seizure, but at no point did the mean FWHM surpass the threshold  
362 of 1 SD above the preictal mean (Patient 21; Table 2). In this instance, the clinical SOZ was in

363 the right insula and somatosensory cortex, with waveform alterations in the right hippocampus.  
364 While recruitment of the hippocampus is plausible, this may represent a false positive as a result  
365 of the temporally coarse statistical test.

366 The UMA and BF array recordings together provide evidence supporting the dual-territory  
367 model of seizures: an ictal core with waveform changes, coexisting with a penumbral territory  
368 with stable spike shapes. Combined, these indicate that the definitions of ictal recruitment and  
369 penumbra are maintained at the level of single neurons, and waveshape change can be  
370 considered a defining feature of recruitment to the seizure. In a subset of recordings, stable  
371 action potentials were found simultaneously with waveform changes both in separate BF arrays  
372 (5 seizures) and on the same UMA (1 seizure; Patient 6), with clinical correlation matching these  
373 observations in all cases. In the UMA, clinical observations were consistent with location of the  
374 UMA at the outer boundary of seizure invasion, and thus we posit this is a simultaneous  
375 recording of both recruited and penumbral cortex (Fig. 7).

376 Furthermore, in 2 seizures, recruitment was found at multiple BF arrays, consistent with  
377 clinically defined SOZ and regions of spread, along with relative delays in keeping with  
378 anatomical distance (Fig. 8; Patients 14 & 15; mid-cingulate to hippocampus in 10.3 s,  
379 hippocampal head to body in 1.1 s respectively). Note also, that in Patient 6 there is an increase  
380 in waveforms of brief duration during the ictal period (data available online; population data  
381 shown in Fig. 6B). Given the UMA's proximity to the oncoming ictal wavefront, this increase  
382 may be explained by an increase in firing of fast-spiking interneurons, which have been shown to  
383 exhibit action potentials of shorter duration (McCormick & Feese, 1990; Csicsvari *et al.*, 1999;  
384 Peyrache *et al.*, 2012) and would corroborate the penumbral feedforward inhibition model  
385 (Trevelyan *et al.*, 2007; Cammarota *et al.*, 2013; Parrish *et al.*, 2019).

386 More specifically, the waveform changes found in recruited tissue are in keeping with  
387 those observed in animal models, and are indicative of the shortening and broadening of action  
388 potentials associated with PDS (Traub & Wong, 1982). This was especially evident in a unique  
389 BF array recording wherein a unit was able to be tracked without need for extra methods due to  
390 its amplitude being 14 times that of the background noise (Patient 15; Fig. 8), with feature  
391 alterations strikingly reminiscent of the UMA population data (c.f. Figs. 4B & 8D), with timing  
392 in keeping with recruitment, during tonic firing (c.f. Figs. 7 & 8).

393 Even so, the extent to which these waveforms alter is likely underrepresented in the  
394 population data, due to changing detection sensitivity from interference between synchronous  
395 spikes or the reduction of amplitude of some spikes below the noise threshold. The template-  
396 matching method was designed to minimize false negatives in order to capture as much single  
397 unit activity during seizures as possible, but it is likely that spikes undergo large enough changes  
398 to be lost outside the convex hull, or below threshold. Indeed, even physiological bursting has  
399 been shown to result in substantial alterations to extracellularly recorded action potentials (Harris  
400 *et al.*, 2000; Henze *et al.*, 2000). As such, these results are necessarily a snapshot of the total  
401 activity of any individual neuron during the seizure, and yet still show significant changes to  
402 waveform.

403 Finally, our data also demonstrate that the passage of the ictal wavefront is marked by tonic,  
404 local neuronal firing (Fig. 9), as opposed to the wavefront being a signature of increased  $K^+$   
405 concentration or similar subthreshold phenomena. Studies of single unit activity recorded in  
406 humans have rarely reported such a finding. Although placement of the electrodes likely plays a  
407 large role, our findings in this paper suggest that extreme, rapid waveform alterations may  
408 obscure the presence of the wavefront when standard spike sorting methods are used. Note that  
409 these firing rate statistics are probabilistic, having been scaled by the probability each spike was

410 a match to its preictal unit (see Methods), and as such are conservative and thus the increase  
411 cannot be attributed purely to increases in background spikes being matched by the convex hull  
412 method.

413       This method of tracking single units across the ictal transition will enable the use of both  
414 human and animal recordings to address open questions regarding the mechanism of seizure  
415 spread. An immediate application, given the neuronal activity presented here, is to study how cell  
416 types relate to the propagation of pathological activity, with considerable debate having focused  
417 recently on the role of interneurons in seizure spread (Grasse *et al.*, 2013; Elahian *et al.*, 2018;  
418 Magloire *et al.*, 2018; Miri *et al.*, 2018; Weiss *et al.*, 2018). All studies to date, to our knowledge,  
419 have assessed cell-type specific activity at seizure onset in regions without waveform alterations,  
420 and thus we suggest are recordings from penumbral territories. As such, we anticipate elucidation  
421 of these mechanisms will come from population data confirmed to be in recruited tissue. These  
422 methods lay important groundwork for analyses into how ictal propagation relates to the  
423 underlying firing of local inhibitory and excitatory cells.

424 **REFERENCES**

- 425 Babb TL, Wilson CL & Isokawa-Akesson M (1987). Firing patterns of human limbic neurons  
426 during stereoencephalography (SEEG) and clinical temporal lobe seizures.  
427 *Electroencephalogr Clin Neurophysiol* 66, 467–482.
- 428 Bower MR, Stead M, Meyer FB, Marsh WR & Worrell GA (2012). Spatiotemporal neuronal  
429 correlates of seizure generation in focal epilepsy. *Epilepsia* 53, 807–816.
- 430 Cammarota M, Losi G, Chiavegato A, Zonta M & Carmignoto G (2013). Fast spiking  
431 interneuron control of seizure propagation in a cortical slice model of focal epilepsy. *The*  
432 *Journal of Physiology* 591, 807–822.
- 433 Csicsvari J, Hirase H, Czurkó A, Mamiya A & Buzsaki G (1999). Oscillatory coupling of  
434 hippocampal pyramidal cells and interneurons in the behaving Rat. *Journal of*  
435 *Neuroscience* 19, 274–287.
- 436 Eissa TL, Tryba AK, Marcuccilli CJ, Ben-Mabrouk F, Smith EH, Lew SM, Goodman RR,  
437 McKhann GM, Frim DM, Pesce LL, Kohrman MH, Emerson RG, Schevon CA & van  
438 Drongelen W (2016). Multiscale Aspects of Generation of High-Gamma Activity during  
439 Seizures in Human Neocortex. *eneuro* 3, ENEURO.0141–15.2016–17.
- 440 Elahian B, Lado NE, Mankin E, Vangala S, Misra A, Moxon K, Fried I, Sharan A, Yeasin M,  
441 Staba R, Bragin A, Avoli M, Sperling MR, Engel J & Weiss SA (2018). Low-voltage fast  
442 seizures in humans begin with increased interneuron firing. *Annals of neurology* 84, 588–  
443 600.
- 444 Fariello RG, Portera A & Scheffner D (1976). Parenteral Penicillin in Rats: An Experimental  
445 Model of Multifocal Epilepsy. *Epilepsia* 17, 217–222.
- 446 Grasse DW, Karunakaran S & Moxon KA (2013). Neuronal synchrony and the transition to  
447 spontaneous seizures. *Experimental Neurology* 248, 72–84.
- 448 Grone BP & Baraban SC (2015). Animal models in epilepsy research: legacies and new  
449 directions. *Nature neuroscience* 18, 339–343.
- 450 Harris KD, Henze DA, Csicsvari J, Hirase H & Buzsaki G (2000). Accuracy of tetrode spike  
451 separation as determined by simultaneous intracellular and extracellular measurements.  
452 *Journal of Neurophysiology* 84, 401–414.
- 453 Henze DA, Borhegyi Z, Csicsvari J, Mamiya A, Harris KD & Buzsaki G (2000). Intracellular  
454 features predicted by extracellular recordings in the hippocampus in vivo. *Journal of*  
455 *Neurophysiology* 84, 390–400.
- 456 Hill DN, Mehta SB & Kleinfeld D (2011). Quality metrics to accompany spike sorting of  
457 extracellular signals. *The Journal of Neuroscience* 31, 8699–8705.
- 458 Kandel ER & Spencer WA (1961a). The pyramidal cell during hippocampal seizure. *Epilepsia* 2,  
459 63–69.

- 460 Kandel ER & Spencer WA (1961*b*). Electrophysiology of hippocampal neurons. II. After-  
461 potentials and repetitive firing. *J Neurophysiol* 24, 243–259.
- 462 Keller D, Erö C & Markram H (2018). Cell Densities in the Mouse Brain: A Systematic Review.  
463 *Frontiers in Neuroanatomy* 12, 506–21.
- 464 Magloire V, Mercier MS, Kullmann DM & Pavlov I (2018). GABAergic Interneurons in  
465 Seizures: Investigating Causality With Optogenetics. *The Neuroscientist* 35,  
466 107385841880500–15.
- 467 Marcuccilli CJ, Tryba AK, van Drongelen W, Koch H, Viemari JC, Peña-Ortega F, Doren EL,  
468 Pytel P, Chevalier M, Mrejeru A, Kohrman MH, Lasky RE, Lew SM, Frim DM &  
469 Ramirez J-M (2010). Neuronal Bursting Properties in Focal and Parafocal Regions in  
470 Pediatric Neocortical Epilepsy Stratified by Histology: *Journal of Clinical*  
471 *Neurophysiology* 27, 387–397.
- 472 Matsumoto H & Marsan CA (1964). Cortical cellular phenomena in experimental epilepsy: Ictal  
473 manifestations. *Exp Neurol* 9, 305–326.
- 474 McCormick DA & Feeseer HR (1990). Functional implications of burst firing and single spike  
475 activity in lateral geniculate relay neurons. *Neuroscience*; DOI: 10.1016/0306-  
476 4522(90)90225-S.
- 477 Merricks EM, Smith EH, McKhann GM, Goodman RR, Bateman LM, Emerson RG, Schevon  
478 CA & Trevelyan AJ (2015). Single unit action potentials in humans and the effect of  
479 seizure activity. *Brain : a journal of neurology* 138, 2891–2906.
- 480 Miri ML, Vinck M, Pant R & Cardin JA (2018). Altered hippocampal interneuron activity  
481 precedes ictal onset. *eLife* 7, 1277.
- 482 Pakkenberg B & Gundersen HJ (1997). Neocortical neuron number in humans: effect of sex and  
483 age. *The Journal of comparative neurology* 384, 312–320.
- 484 Parrish RR, Codadu NK, Mackenzie Gray Scott C & Trevelyan AJ (2019). Feedforward  
485 inhibition ahead of ictal wavefronts is provided by both parvalbumin- and somatostatin-  
486 expressing interneurons. *The Journal of physiology* 597, 2297–2314.
- 487 Peyrache A, Dehghani N, Eskandar EN, Madsen JR, Anderson WS, Donoghue JA, Hochberg LR,  
488 Halgren E, Cash SS & Destexhe A (2012). Spatiotemporal dynamics of neocortical  
489 excitation and inhibition during human sleep. *Proceedings of the National Academy of*  
490 *Sciences of the United States of America* 109, 1731–1736.
- 491 Purpura DP, Penry JK, Tower DB & Woodbury DM eds. (1972). *Experimental models of*  
492 *epilepsy: A manual for the laboratory worker*. Raven Press, New York.
- 493 Quian Quiroga R, Nadasdy Z & Ben-Shaul Y (2004). Unsupervised Spike Detection and Sorting  
494 with Wavelets and Superparamagnetic Clustering. *Neural Computation* 16, 1661–1687.

- 495 Schevon CA, Tobochnik S, Eissa T, Merricks E, Gill B, Parrish RR, Bateman LM, McKhann  
496 GM, Emerson RG & Trevelyan AJ (2019). Multiscale recordings reveal the dynamic  
497 spatial structure of human seizures. *Neurobiology of disease* 127, 303–311.
- 498 Schevon CA, Weiss SA, McKhann G, Goodman RR, Yuste R, Emerson RG & Trevelyan AJ  
499 (2012). Evidence of an inhibitory restraint of seizure activity in humans. *Nature*  
500 *Communications* 3, 1060–11.
- 501 Smith EH, Liou J, Davis TS, Merricks EM, Kellis SS, Weiss SA, Greger B, House PA, McKhann  
502 GM, Goodman RR, Emerson RG, Bateman LM, Trevelyan AJ & Schevon CA (2016).  
503 The ictal wavefront is the spatiotemporal source of discharges during spontaneous human  
504 seizures. *Nat Commun* 7, 11098.
- 505 Stead M, Bower M, Brinkmann BH, Lee K, Marsh WR, Meyer FB, Litt B, Van Gompel J &  
506 Worrell GA (2010). Microseizures and the spatiotemporal scales of human partial  
507 epilepsy. *Brain* 133, 2789–2797.
- 508 Steriade M & Amzica F (1999). Intracellular study of excitability in the seizure-prone neocortex  
509 in vivo. *Journal of Neurophysiology* 82, 3108–3122.
- 510 Tóth E, Fabó D, Entz L, Ulbert I & Eröss L (2016). Intracranial neuronal ensemble recordings  
511 and analysis in epilepsy. *Journal of Neuroscience Methods* 260, 261–269.
- 512 Traub RD & Wong RK (1982). Cellular mechanism of neuronal synchronization in epilepsy.  
513 *Science* 216, 745–747.
- 514 Trevelyan AJ, Sussillo D, Watson BO & Yuste R (2006). Modular propagation of epileptiform  
515 activity: evidence for an inhibitory veto in neocortex. *The Journal of Neuroscience* 26,  
516 12447–12455.
- 517 Trevelyan AJ, Sussillo D & Yuste R (2007). Feedforward inhibition contributes to the control of  
518 epileptiform propagation speed. *The Journal of Neuroscience* 27, 3383–3387.
- 519 Truccolo W, Ahmed OJ, Harrison MT, Eskandar EN, Cosgrove GR, Madsen JR, Blum AS, Potter  
520 NS, Hochberg LR & Cash SS (2014). Neuronal ensemble synchrony during human focal  
521 seizures. *The Journal of Neuroscience* 34, 9927–9944.
- 522 Truccolo W, Donoghue JA, Hochberg LR, Eskandar EN, Madsen JR, Anderson WS, Brown EN,  
523 Halgren E & Cash SS (2011). Single-neuron dynamics in human focal epilepsy. *Nature*  
524 *neuroscience* 14, 635–641.
- 525 Weiss SA, Banks GP, McKhann GM, Goodman RR, Emerson RG, Trevelyan AJ & Schevon CA  
526 (2013). Ictal high frequency oscillations distinguish two types of seizure territories in  
527 humans. *Brain* 136, 3796–3808.
- 528 Weiss SA, Staba R, Bragin A, Moxon K, Sperling M, Avoli M & Engel J (2018). Interneurons  
529 and principal cell firing in human limbic areas at focal seizure onset. *Neurobiology of*  
530 *disease* 124, 183–188.

531 Wyler AR, Ojemann GA & Ward AA (1982). Neurons in human epileptic cortex: correlation  
532 between unit and EEG activity. *Annals of neurology* 11, 301–308.

533



534 **FIGURES**

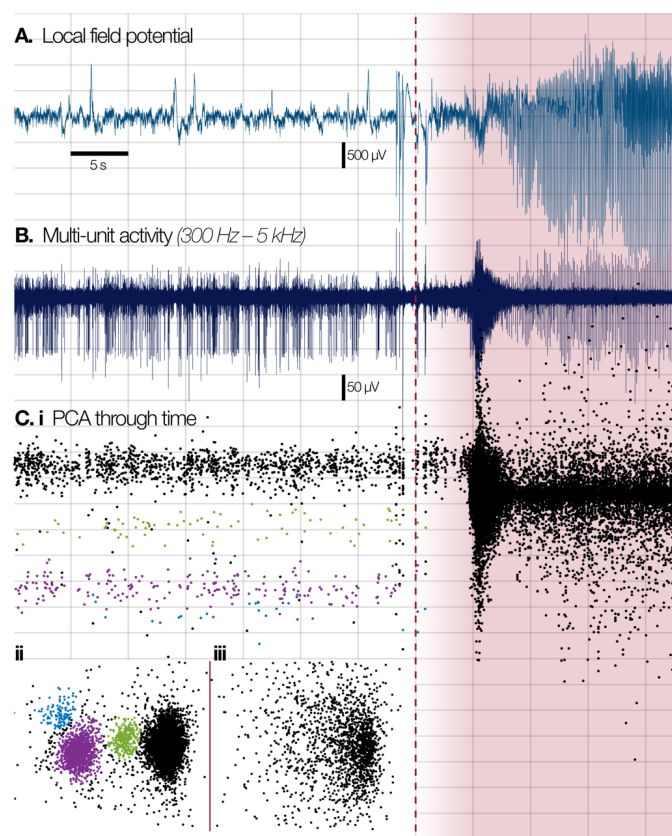

535

536 ***Fig. 1. Effects of ictal recruitment on traditional spike sorting methods***

537 Spike sorting relies on stable waveforms from nearby neurons, but ictal activity disrupts features  
538 used to cluster single units. **A.** Example broadband LFP from a single channel of a Utah array  
539 implanted in the posterior temporal lobe of a patient with pharmaco-resistant epilepsy (Patient 4,  
540 seizure 1). Dashed red line denotes “global” seizure onset. **B.** Bandpass filtered signal between  
541 300 Hz and 5 kHz of the same signal in A, showing stable single unit activity in the preictal  
542 period. **C.** First principal component score versus time (**i**) of all detected spikes in the multi-unit  
543 activity shown in B, with three clearly separable clusters highlighted, along with the multi-unit  
544 cluster from background distal cells (black). (**ii**) Equivalent first versus second principal  
545 component scores from the preictal period, and (**iii**), during the seizure. Note loss of well-defined  
546 clusters in principal component space.

547

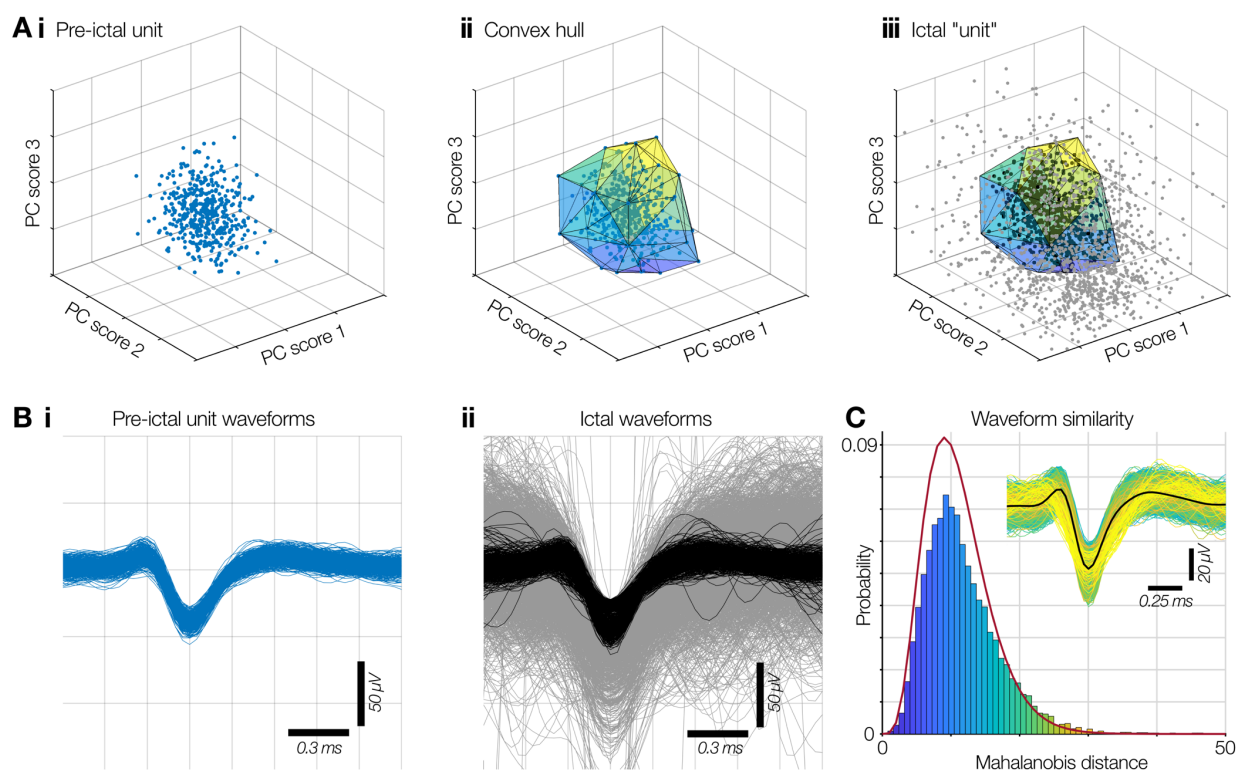

548

549 **Fig. 2. Template match spike sorting via convex hulls**

550 **A.** Well-isolated neurons form distinct clusters in principal component space during interictal  
551 time points (i), around which a convex hull can be fitted to define boundaries in 3D space within  
552 which spikes that match that unit should exist (ii). Despite a lack of defined clusters during ictal  
553 activity in recruited cortex, this convex hull can be used to select waveforms that are likely to  
554 correspond to the preictal unit (iii; black), amongst distributed noise (grey). **B(i)** Waveforms  
555 from the preictal cluster shown in A(i). **(ii)** Waveforms matched using the convex hull shown in  
556 A(iii) (black) from the large distribution of spikes during a seizure (grey). **C.** The probability of  
557 each matched waveform originating from the same neuron as its preictal counterpart is calculated  
558 by calculating their Mahalanobis distance from the preictal cluster using the first  $n$  principal  
559 components that explain  $\geq 95\%$  of the variance. Outliers in the chi-squared distribution for  $n$   
560 degrees of freedom denote likely incorrect matches.

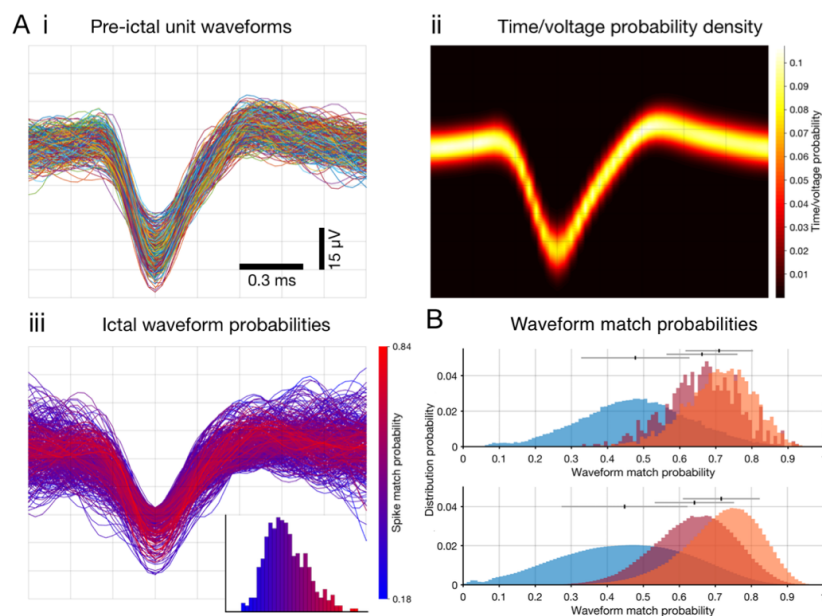

**Fig. 3. Waveform match probabilities**

**A(i).** All waveforms from a traditionally spike sorted unit in a 10 minute preictal epoch. The probability distribution of each voltage at each time point for these waveforms is shown in **(ii)**, and the spike match probabilities for ictal waveforms matching this unit are shown in **(iii)**, with the distribution of these probabilities inset. **B.** Upper panel shows the probability distribution of all matched waveforms (red), compared to the probability distribution for the original waveforms in the preictal time point (orange) for an example template-matched single unit. A bootstrap estimate of waveform matches expected by chance by comparing against waveforms from other electrodes is shown in blue. The lower panel shows the equivalent distributions across the full population. Mean  $\pm$  SD is shown above the distributions.

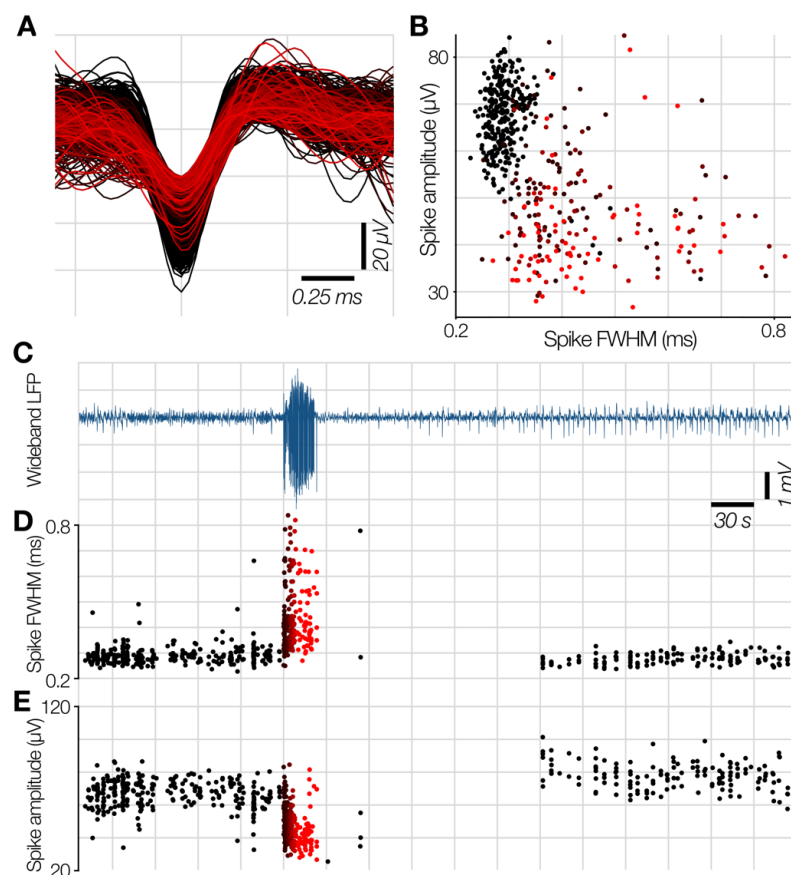

572

573 **Fig. 4. Example wave shape changes at ictal recruitment in template matched data**

574 **A.** Waveforms from a convex hull-matched unit in Patient 5, seizure 2, showing reduction in  
575 amplitude and increase in FWHM during the seizure (red shaded waveforms, fading from black  
576 to red through the seizure; color maintained throughout figure). **B.** Spike amplitude versus  
577 FWHM in the unit in A, showing equivalent relationship to the high amplitude BF single unit in  
578 Fig. 8D. Wideband LFP from this channel through time (**C**), with time-locked FWHM (**D**) and  
579 amplitude (**E**) showing temporal relationship of spike shape changes through the seizure. Note  
580 the return to preictal values after seizure termination, and the lack of changes towards decreased  
581 FWHM or increased amplitude during the seizure despite the convex hull being equally  
582 permissive of alterations in any direction.

583

A Patient 5, seizure 1, channel 48

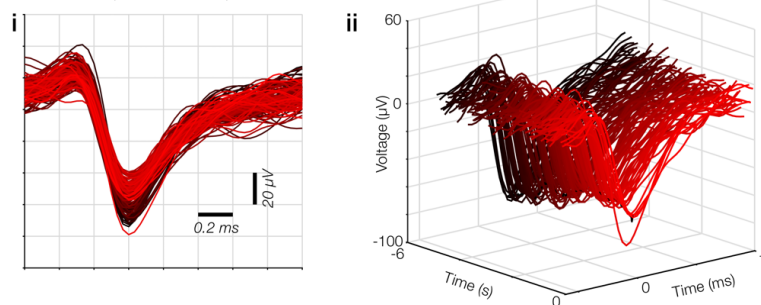

B Patient 5, seizure 2, channel 48

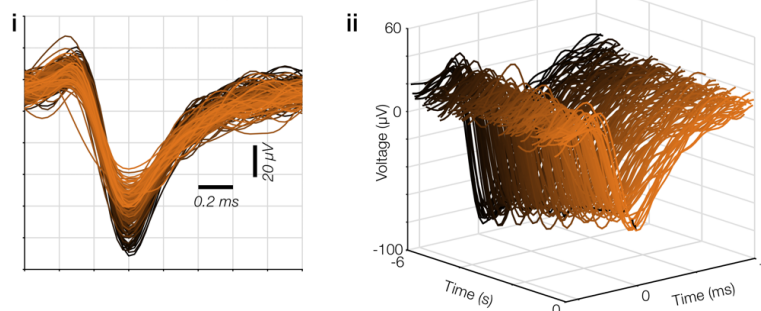

584

585 ***Fig. 5. Stereotypy of waveform changes within neurons across seizures***

586 Example waveforms from a single unit in patient 5 showing stereotypy of response of  
587 extracellularly recorded action potentials in the peri-recruitment period in 2 seizures separated by  
588 22 hours (A and B respectively). All waveforms from the 6 seconds prior to ictal recruitment are  
589 shown overlaid in (i), and plotted relative to time in (ii), scales maintained throughout. Saturation  
590 of color fades from black at -6 seconds, to brightest at the moment of maximal firing rate of  
591 MUA at that electrode.

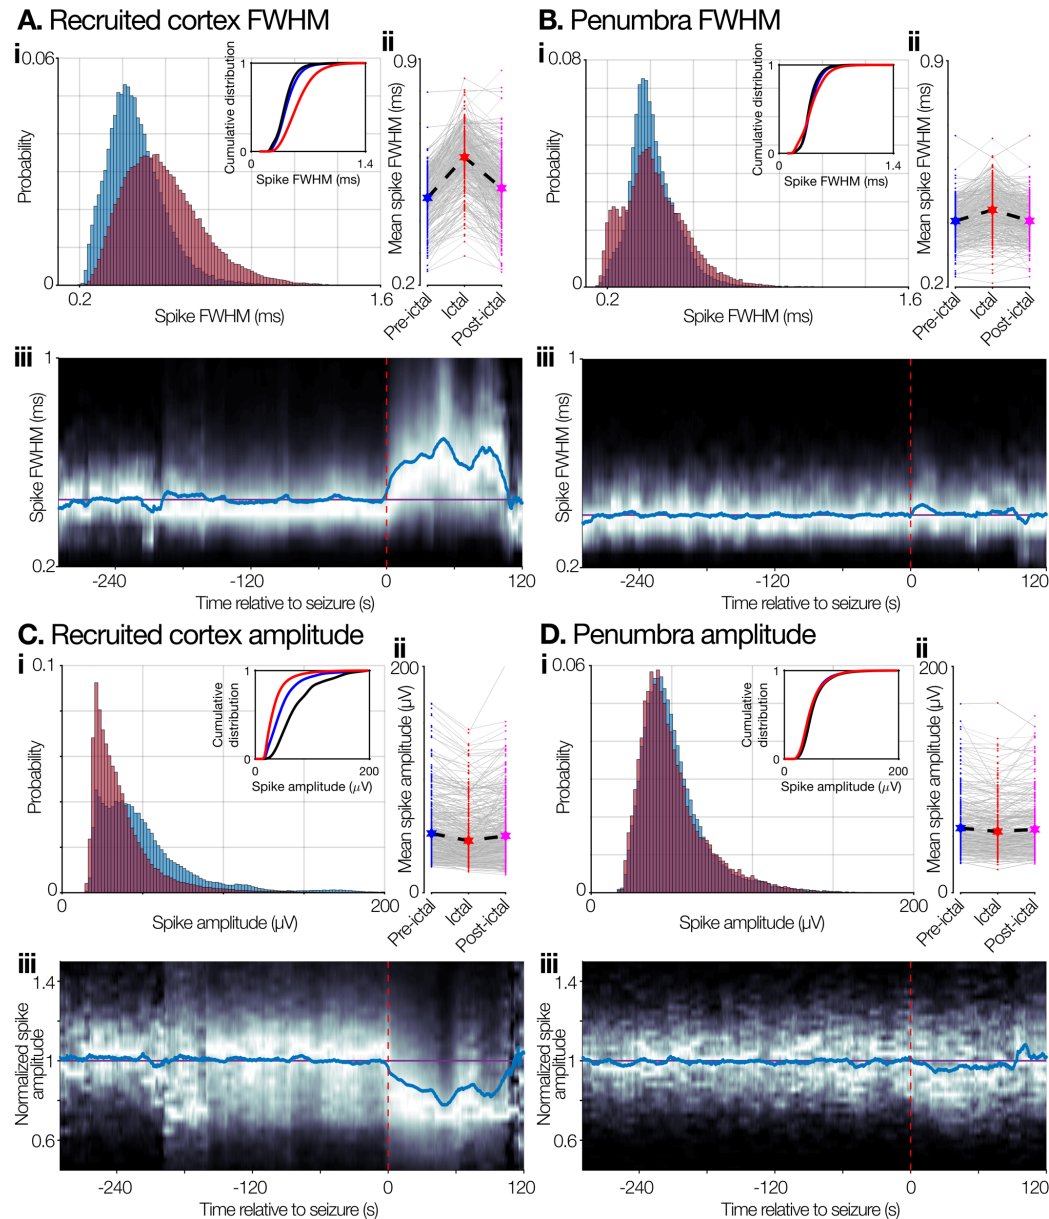

592

593 **Fig. 6. Population spike shape alterations in recruited cortex versus penumbral territories**

594 **A & B (i)** Probability density plots of spike FWHM (full-width at half maximum) for every

595 detected waveform in the preictal (blue) and ictal time periods for all seizures in recruited cortex

596 (A;  $n = 625$  units from 6 seizures in 3 patients) and penumbral tissue (B;  $n = 405$  units from 4

597 seizures in 3 patients). Cumulative probability densities show same calculation on preictal,

598 original data (black), **(ii)** Paired mean FWHM for each unit in the preictal (blue), ictal (red), and

599 postictal (pink) epochs. Note return to preictal ranges after seizure termination. **(iii)** Spike

600 FWHM of the population through time (10 second window, sliding every 100 ms). Brighter  
601 indicates more density, blue line shows the mean through time, purple line shows the mean value  
602 in the preictal period, red dashed line denotes “global” seizure onset. **C & D.** Same format as A  
603 & B, showing spike amplitude in place of FWHM, for recruited cortex and penumbra  
604 respectively.

605

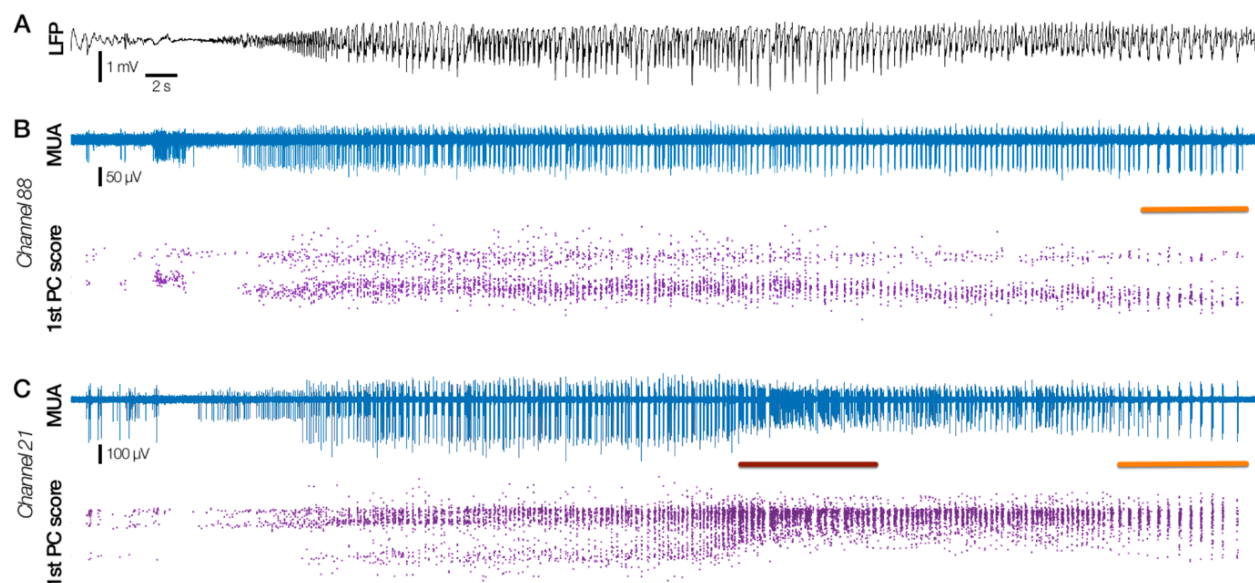

606

607 **Fig. 7. Simultaneous recruitment and penumbral recording.**

608 Two types of activity pattern recorded simultaneously in a patient with the Utah array at the edge  
609 of the clinically defined seizure spread (Patient 6). **A.** LFP from the closest macro-electrode to  
610 the UMA, with time-locked MUA (blue) and first principal component score (purple) through  
611 time from channels 88 and 21 in **B & C** respectively. Note the stability of waveform and  
612 principal component score throughout the seizure in channel 88, with no evidence of tonic firing,  
613 while there is a large spike shape change at the same time in channel 21, at the moment of tonic  
614 firing (maroon bar, C). Paired orange bars in B and C denote burst firing at the end of the seizure  
615 in both locations. These dual activity types both occurred immediately next to the LFP in A, and  
616 thus these patterns cannot be differentiated at the macro LFP level.

617

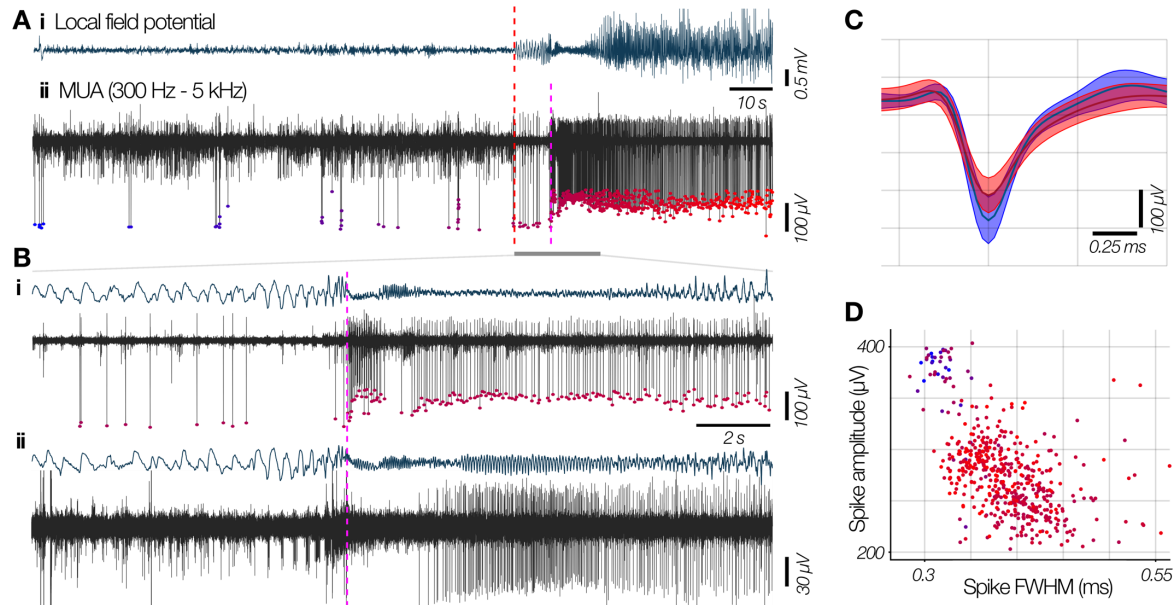

618

619 **Fig. 8. Ictal recruitment in the mesial temporal lobe recorded with BF electrodes**

620 **A. (i)** Broadband LFP from the closest macro contact to the microwires in a BF electrode in the  
621 mesial temporal lobe during a spontaneous seizure, and **(ii)** the bandpass filtered MUA from one  
622 of the microwires in the temporal pole. “Global” seizure onset is denoted by the red dashed line,  
623 with subsequent local recruitment to the seizure at the pink dashed line. **B.** Magnification of the  
624 region denoted by the grey bar in A, showing seizure onset through passage of the ictal  
625 wavefront in LFP and MUA (colours maintained) in the same microwire **(i)**, and a microwire  
626 from a nearby separate BF in the hippocampal body **(ii)**. Note the pre-recruitment stability in the  
627 spike amplitude, which is immediately reduced upon ictal invasion, and the simultaneous  
628 quiescence in the hippocampal body, followed by a similar, time-delayed amplitude change after  
629 recruitment. **C.** Mean  $\pm$  SD of waveforms prior to ictal invasion (blue) and after recruitment  
630 during the seizure (red), showing reduction in amplitude and increase in FWHM in A(ii). **D.**  
631 Spike amplitude versus spike FWHM for the defined unit, with color maintained from A,



632 transitioning from blue to red through seizure invasion. Note the bimodal clusters that  
633 correspond to pre- and post-recruitment, and the similarity to Fig. 4B.

634

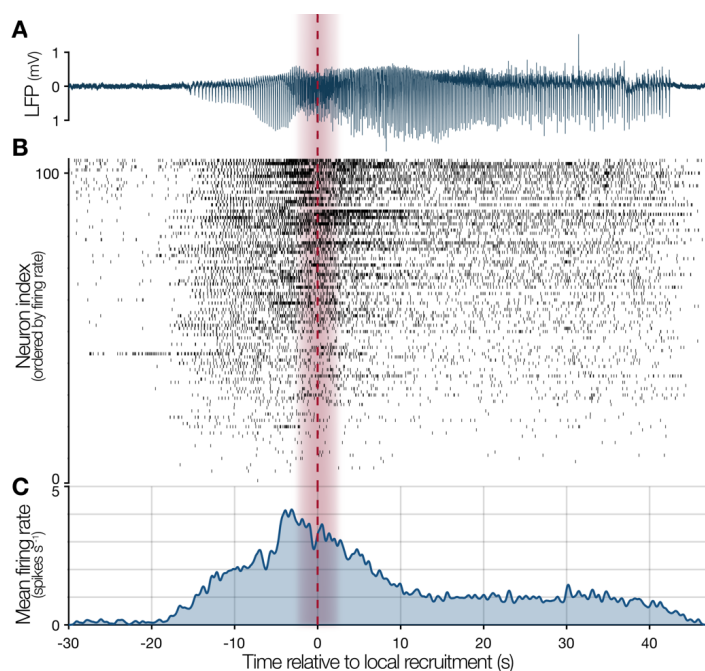

635

636 **Fig. 9. Neuronal firing through ictal recruitment in an example focal seizure**

637 **A.** Local field potential (LFP) from an example channel during seizure 1 in Patient 3, with the  
638 calculated passage of ictal wavefront marked by red dashed line, with  $\pm 2$  seconds shaded red. **B.**  
639 Raster plot of all units found using convex hull template matching in this seizure, ordered by  
640 firing rate, and plotted relative to the moment of ictal recruitment at that channel. **C.** Probabilistic  
641 instantaneous firing rate of the population of single units as estimated by convolving a Gaussian  
642 kernel (200 ms SD) over the spike times. The firing rate shown is probabilistic by scaling the  
643 Gaussian kernel's amplitude by the likelihood of each individual spike originating from its  
644 assigned preictal unit, as calculated by its voltage-time probabilities (see Methods & Fig. 3). As  
645 such, the firing rate has not been biased by excessive matching of dissimilar waveforms during  
646 the ictal activity. Note the intense, tonic firing during the seizure invasion, and sustained, above  
647 baseline firing until seizure termination.

648 **TABLES**

| Patient | Demographics | Implant location                            | Seizure type | Seizure onset                                        | Seizures analyzed | # units        |
|---------|--------------|---------------------------------------------|--------------|------------------------------------------------------|-------------------|----------------|
| 1       | 30 M         | Frontal<br>(Left frontal convexity)         | FIA          | Left supplementary motor area                        | 1                 | 79             |
| 2       | 39 M         | Frontal<br>(Left dorsolateral frontal lobe) | FIA          | Left frontal operculum                               | 2                 | [61, 61]       |
| 3       | 25 F         | Temporal<br>(Left inferior temporal gyrus)  | FIA          | Left basal/<br>anterior temporal                     | 3                 | [111, 101, 91] |
| 4       | 19 F         | Temporal<br>(Right posterior temporal)      | FTBTC        | Right posterior lateral temporal                     | 1                 | 110            |
| 5       | 24 M         | Temporal<br>(Left inferior temporal gyrus)  | FIA          | Left mesial temporal with spread to lateral temporal | 2                 | [120, 133]     |
| 6       | 30 M         | Temporal<br>(Right mesial temporal gyrus)   | FA           | Right subtemporal                                    | 1                 | 240            |

649 ***Table 1. Demographics and data for patients implanted with Utah arrays***

650 Individual patient demographics for grid/Utah array implant cases, including the number of  
651 isolated single units found for each seizure in each patient. FIA: focal with impaired awareness;  
652 FTBTC: focal to bilateral tonic-clonic.

653

## NEURONAL ACTIVITY IN HUMAN SEIZURES

35

| Patient | Demographics | Implant locations with units                                    | Seizure type | Seizure onset                                          | Seizures analyzed | # units   | Microwires with waveform alterations           | Time of recruitment (s) | Clinical correlation |
|---------|--------------|-----------------------------------------------------------------|--------------|--------------------------------------------------------|-------------------|-----------|------------------------------------------------|-------------------------|----------------------|
| 7       | 29 F         | Mesial temporal (Left hippocampus)                              | FTBTC        | Left lateral frontal                                   | 2                 | [2, 2]    | Left hippocampus                               | 16.3                    | Spread               |
| 8       | 29 F         | Mesial temporal (Left hippocampus)                              | FA           | Left mesial temporal                                   | 2                 | [2, 1]    | Left hippocampal head                          | 16.1                    | ✓+                   |
| 9       | 55 F         | Mesial temporal (Right hippocampus)                             | FIA          | Right lateral temporal                                 | 1                 | 9         | –                                              | –                       | ✓–                   |
| 10      | 25 M         | Mesial temporal (Left hippocampal body)                         | FIA          | Right mesial temporal and right parietal (dual)        | 1                 | 1         | Left hippocampal body                          | 42.7                    | Spread               |
| 11      | 19 M         | Frontal (Right anterior cingulate)                              | FIA          | Right lateral temporal                                 | 1                 | 3         | Right supplementary motor area                 | 9.1                     | Spread               |
| 12      | 20 F         | Frontal (Left anterior & mid-cingulate)                         | FA           | Left mesial temporal                                   | 1                 | 15        | Left mid-cingulate                             | 19.5                    | Spread               |
| 13      | 21 F         | Mesial temporal (Left hippocampus)                              | FA           | Left anterior temporal pole                            | 1                 | 1         | –                                              | –                       | ✓–                   |
| 14      | 40 M         | Mesial temporal/frontal (Left hippocampus & anterior cingulate) | FIA          | Left lateral frontal                                   | 2                 | [9, 10]   | Left hippocampus; Left mid-cingulate           | 39.3 (HC); 29.0 (MC)    | Spread               |
| 15      | 25 F         | Mesial temporal (Right hippocampus body & head)                 | FIA          | Right lateral temporal spreading to mesial temporal    | 1                 | 11        | Right hippocampal body; Right hippocampal head | 9.1 (HCB); 8.0 (HCH)    | ✓+                   |
| 16      | 35 F         | Mesial temporal (Bilateral hippocampus)                         | FIA          | Left mesial temporal                                   | 1                 | 5         | Left hippocampal head                          | 8.0                     | ✓+                   |
| 17      | 40 M         | Mesial temporal (Left hippocampus)                              | FIA          | Left mesial parietal                                   | 1                 | 2         | –                                              | –                       | ✓–                   |
| 18      | 39 M         | Frontal (Right mesial cingulate)                                | FIA; FTBTC   | Right mesial temporal and left orbitofrontal (2 types) | 2                 | [8, 4]    | –                                              | –                       | ✓–                   |
| 19      | 30 M         | Frontal (Right mesial cingulate)                                | FA; FIA      | Left mesial temporal and left insula                   | 2                 | [1, 1]    | –                                              | –                       | ✓–                   |
| 20      | 23 F         | Mesial temporal (Right hippocampus)                             | FIA          | Right posterior temporal                               | 1                 | 3         | –                                              | –                       | ✓–                   |
| 21      | 35 M         | Mesial temporal (Bilateral hippocampus)                         | FA           | Right insula and somatosensory cortex                  | 3                 | [7, 8, 7] | Right hippocampal head                         | Sub-threshold           | Spread /X+           |
| 22      | 44 F         | Frontal (Right anterior cingulate)                              | FTBTC        | Left cingulate                                         | 1                 | 1         | Right anterior/mid-cingulate                   | 15.2                    | Spread               |
| 23      | 51 F         | Frontal (Left anterior cingulate)                               | FIA          | Left mesial temporal                                   | 1                 | 4         | Left anterior cingulate                        | 12.6                    | Spread               |
| 24      | 20 M         | Frontal (Left anterior cingulate)                               | FIA          | Left posterior temporal                                | 1                 | 1         | –                                              | –                       | ✓–                   |
| 25      | 30 F         | Frontal (Right anterior cingulate)                              | FIA          | Left mesial temporal                                   | 1                 | 1         | –                                              | –                       | ✓–                   |
| 26      | 20 M         | Mesial temporal (Right hippocampus)                             | FIA          | Right mesial temporal                                  | 2                 | [1, 2]    | Right hippocampal body                         | 10.4                    | ✓+                   |
| 27      | 32 M         | Mesial temporal (Bilateral hippocampus)                         | FIA          | Bilateral mesial temporal                              | 3                 | [4, 3, 3] | Hippocampal body                               | 9.8                     | ✓+                   |

654 **Table 2. Demographics and results for patients implanted with Behnke-Fried arrays**

655 Individual patient demographics for stereo-EEG/Behnke-Fried array cases, including the number  
 656 of isolated single units found for each seizure in each patient, implant locations that showed

657 significant waveshape alterations, the delay until waveforms surpassed  $> 1$  SD beyond the  
658 preictal mean, and whether clinical observations matched these findings. FTBTC: focal to  
659 bilateral tonic-clonic; FA: focal aware; FIA: focal with impaired awareness; HC: hippocampus;  
660 MC: mid-cingulate; “Spread”: matches clinical observations of seizure spread; ✓+: true positive  
661 match for clinical observations; ✓-: true negative match for clinical observations; ✗+: false  
662 positive match for clinical observations.  
663

| Patient | Seizure # | Recruited? | Units from convex hull [n] | Units showing FR increase in ictal wavefront [n (%)] | Units showing significant FWHM increase [n (%)] | Units showing significant amplitude decrease [n (%)] |
|---------|-----------|------------|----------------------------|------------------------------------------------------|-------------------------------------------------|------------------------------------------------------|
| 1       | 1         | X          | 52                         | N/A                                                  | 2 (4%)                                          | 3 (6%)                                               |
| 2       | 1         | X          | 55                         | N/A                                                  | 9 (16%)                                         | 8 (15%)                                              |
|         | 2         | X          | 49                         | N/A                                                  | 3 (6%)                                          | 2 (4%)                                               |
| 3       | 1         | ✓          | 80                         | 77 (96%)                                             | 63 (79%)                                        | 20 (25%)                                             |
|         | 2         | ✓          | 80                         | 70 (88%)                                             | 68 (85%)                                        | 38 (48%)                                             |
|         | 3         | ✓          | 79                         | 67 (85%)                                             | 66 (84%)                                        | 40 (51%)                                             |
| 4       | 1         | ✓          | 101                        | 77 (76%)                                             | 93 (92%)                                        | 45 (45%)                                             |
| 5       | 1         | ✓          | 117                        | 82 (70%)                                             | 114 (97%)                                       | 103 (88%)                                            |
|         | 2         | ✓          | 104                        | 73 (70%)                                             | 85 (82%)                                        | 63 (61%)                                             |
| 6       | 1         | X          | 221                        | N/A                                                  | 105 (48%)                                       | 86 (39%)                                             |

664 **Table 3. Single unit data from Utah array population analyses**

665 Total number of units found in each patient and seizure for population analyses in Utah array  
 666 cases via the convex hull template-matching method, along with the number of units showing  
 667 significant increases in firing rate, spike full-width-at-half-maximum (FWHM), and decreases in  
 668 amplitude during the seizure.

669

670 **VIDEO LEGENDS**

671 ***Video 1. Location specific waveform changes during a spontaneous human seizure***

672 Local field potential (top) and spike amplitudes for three units in three different locations  
673 (middle; red, blue and purple), with associated spike waveforms shown to the right. Shading  
674 shows the mean  $\pm$  2 SD for these units' preictal spike amplitudes. The locations of the BF  
675 microwires that recorded these units are shown below, with colors maintained. Note the three  
676 activity patterns: cessation of firing at seizure onset in the anterior temporal lobe (blue), stability  
677 followed by loss of spike amplitude in the anterior cingulate (red), and stability throughout in the  
678 mid-cingulate (purple).

679 ***Video 2. Single unit waveform alterations in an ictal Behnke-Fried recording***

680 Single units undergo waveshape changes upon recruitment to the seizure, shown in real-time.  
681 Upper trace: MUA bandpassed signal (300 Hz to 5 kHz; white), with current time shown in red,  
682 earliest electrographic ictal activity in the patient occurs at dashed magenta line, with local  
683 recruitment occurring at blue dashed line. Lower panels: shaded regions show mean  $\pm$  2 SD for  
684 preictal single units in red and blue, and lower amplitude multiunit activity in yellow (left).  
685 Waveforms are displayed in real-time, with colors matching their assigned unit, and color  
686 saturation showing the probability of a true match to that unit. The first two principal component  
687 scores for these waveforms are shown on the right, with colors maintained. Note the stability of  
688 waveforms prior to local recruitment, including after seizure onset, followed by marked loss of  
689 amplitude at the moment of recruitment with associated tonic firing.
